# Supplementary material for: Successes and failures of sixty years of vector control in French Guiana: what is the next step?
Source: PubMed Central journal article supplement (PMC5851058; doi:10.1590/0074-02760170398), 2018-03-12
Supplement: 0074-0276-mioc-113-5-e170398-suppl01.pdf [file 0074-0276-mioc-113-5-e170398-suppl01.pdf]

TABLE  
Insecticide resistance status based on insecticide testing of *Aedes aegypti* from 1958 to 2009 in several localities in French Guiana

| Source of the data                            | Species                       | Mosquitoes tested  | Collection date or date range | Protocol    | Insecticide tested | Number of mosquitoes tested | Collection site         | Status              |
|-----------------------------------------------|-------------------------------|--------------------|-------------------------------|-------------|--------------------|-----------------------------|-------------------------|---------------------|
| Floch and Fauran (1958)                       | <i>Culex quinquefasciatus</i> | Wild caught larvae | 1958                          | Brown       | DDT                | 240                         | Cayenne                 | loss susceptibility |
| Floch and Fauran (1958)                       | <i>C. quinquefasciatus</i>    | Wild caught larvae | 1958                          | Brown       | HCH                | 240                         | Cayenne                 | Resistant           |
| Floch and Fauran (1958)                       | <i>C. quinquefasciatus</i>    | Wild caught larvae | 1958                          | Brown       | Dieldrin           | 240                         | Cayenne                 | Resistant           |
| Floch and Fauran (1958)                       | <i>Anopheles aquasalis</i>    | Wild caught larvae | 1958                          | Brown       | DDT                | 240                         | Rémire-Montjoly         | Susceptible         |
| Floch and Fauran (1958)                       | <i>An. aquasalis</i>          | Wild caught larvae | 1958                          | Brown       | HCH                | 240                         | Rémire-Montjoly         | Susceptible         |
| Floch and Fauran (1958)                       | <i>An. aquasalis</i>          | Wild caught larvae | 1958                          | Brown       | Dieldrin           | 240                         | Rémire-Montjoly         | Susceptible         |
| Fontan and Fauran (1959)                      | <i>Aedes aegypti</i>          | Wild caught larvae | 1959                          | Brown       | DDT                | 345                         | Saint Laurent du maroni | Resistant           |
| Fontan and Fauran (1959)                      | <i>Ae. aegypti</i>            | Wild caught larvae | 1959                          | Brown       | HCH                | 292                         | Saint Laurent du maroni | Susceptible         |
| Fontan and Fauran (1959)                      | <i>Ae. aegypti</i>            | Wild caught larvae | 1959                          | Brown       | Dieldrin           | 235                         | Saint Laurent du maroni | Susceptible         |
| Fontan and Fauran (1959)                      | <i>Ae. aegypti</i>            | adult f1 (gorgee)  | 1959                          | Brown       | DDT                | 197                         | Saint Laurent du maroni | Resistant           |
| Fontan and Fauran (1959)                      | <i>Ae. aegypti</i>            | adult f1 (gorgee)  | 1959                          | Brown       | Dieldrin           | 241                         | Saint Laurent du maroni | Susceptible         |
| Floch (1965a)                                 | <i>Ae. aegypti</i>            | Wild caught larvae | 1963                          | NA          | DDT                | NA                          | Cayenne                 | Resistant           |
| Floch (1965a)                                 | <i>Ae. aegypti</i>            | Wild caught larvae | 1963                          | NA          | dieldrin           | NA                          | Cayenne                 | Resistant           |
| Floch et al. (1966)                           | <i>Ae. aegypti</i>            | adults             | 1965                          | Busvine-Fay | malathion          | 20                          | French Guiana           | susceptible         |
| Floch et al. (1966)                           | <i>Ae. aegypti</i>            | adults             | 1965                          | Busvine-Fay | malathion          | 20                          | French Guiana           | susceptible         |
| Floch et al. (1966)                           | <i>Ae. aegypti</i>            | adults             | 1965                          | Busvine-Fay | malathion          | 20                          | French Guiana           | susceptible         |
| Floch et al. (1966)                           | <i>Ae. aegypti</i>            | adults             | 1965                          | Busvine-Fay | malathion          | 20                          | French Guiana           | susceptible         |
| Floch et al. (1966)                           | <i>Ae. aegypti</i>            | adults             | 1965                          | Busvine-Fay | malathion          | 20                          | French Guiana           | susceptible         |
| Floch et al. (1966)                           | <i>Ae. aegypti</i>            | adults             | 1965                          | Busvine-Fay | malathion          | 20                          | French Guiana           | susceptible         |
| Floch et al. (1966)                           | <i>Ae. aegypti</i>            | adults             | 1965                          | Busvine-Fay | fenthion           | 20                          | French Guiana           | susceptible         |
| Floch et al. (1966)                           | <i>Ae. aegypti</i>            | adults             | 1965                          | Busvine-Fay | fenthion           | 20                          | French Guiana           | susceptible         |
| Floch et al. (1966)                           | <i>Ae. aegypti</i>            | adults             | 1965                          | Busvine-Fay | fenthion           | 20                          | French Guiana           | susceptible         |
| Floch et al. (1966)                           | <i>Ae. aegypti</i>            | adults             | 1965                          | Busvine-Fay | fenthion           | 20                          | French Guiana           | susceptible         |
| Floch et al. (1966)                           | <i>Ae. aegypti</i>            | adults             | 1965                          | Busvine-Fay | fenthion           | 20                          | French Guiana           | susceptible         |
| Cebret and Désiré (1996)                      | <i>Ae. aegypti</i>            | NA                 | 1972                          | NA          | NA                 | NA                          | French Guiana           | susceptible         |
| Annual report, 'Institut Pasteur de la Guyane | <i>Anopheles darlingi</i>     | adult f0           | 1995                          | NA          | deltamethrin       | NA                          | French Guiana           | susceptible         |
| Annual report, 'Institut Pasteur de la Guyane | <i>An. darlingi</i>           | adult f1           | 1996                          | NA          | delta              | NA                          | French Guiana           | susceptible         |

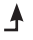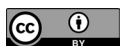

| Source of the data                            | Species            | Mosquitoes tested                     | Collection date or date range | Protocol        | Insecticide tested | Number of mosquitoes tested | Collection site                               | Status      |
|-----------------------------------------------|--------------------|---------------------------------------|-------------------------------|-----------------|--------------------|-----------------------------|-----------------------------------------------|-------------|
| Annual report, 'Institut Pasteur de la Guyane | <i>Ae. aegypti</i> | wild-caught larvae                    | 1995                          | dose-response   | Fenitrothion       | 1200                        | Cayenne, Rémire-Montjoly, Matoury & Sinnamary | Resistant   |
| Annual report, 'Institut Pasteur de la Guyane | <i>Ae. aegypti</i> | wild-caught larvae                    | 1995                          | dose-response   | Fenthion           | 400                         | Cayenne, Rémire-Montjoly, Matoury & Sinnamary | Resistant   |
| Annual report, 'Institut Pasteur de la Guyane | <i>Ae. aegypti</i> | wild-caught larvae                    | 1995                          | dose-response   | Temephos           | 1200                        | Cayenne, Rémire-Montjoly, Matoury & Sinnamary | Resistant   |
| Annual report, 'Institut Pasteur de la Guyane | <i>Ae. aegypti</i> | wild-caught larvae                    | 1998                          | dose-response   | Fenitrothion       | 400                         | Cayenne, Rémire-Montjoly, Matoury & Sinnamary | Resistant   |
| Annual report, 'Institut Pasteur de la Guyane | <i>Ae. aegypti</i> | wild-caught larvae                    | 1998                          | dose-response   | Fenthion (Baytex)  | 800                         | Cayenne, Rémire-Montjoly, Matoury & Sinnamary | Resistant   |
| Annual report, 'Institut Pasteur de la Guyane | <i>Ae. aegypti</i> | wild-caught larvae                    | 1998                          | dose-response   | Temephos           | 1200                        | Cayenne, Rémire-Montjoly, Matoury & Sinnamary | Resistant   |
| Annual report, 'Institut Pasteur de la Guyane | <i>Ae. aegypti</i> | adults reared from wild caught larvae | 2000                          | diagnostic dose | Deltamethrin       | 123                         | degrad des cannes, Cayenne                    | Resistant   |
| Annual report, 'Institut Pasteur de la Guyane | <i>Ae. aegypti</i> | wild-caught larvae                    | 2000                          | dose unique     | Malathion          | 100                         | Rémire-Montjoly                               | Susceptible |
| Annual report, 'Institut Pasteur de la Guyane | <i>Ae. aegypti</i> | adults reared from wild caught larvae | 2000                          | diagnostic dose | Malathion          | 97                          | Rémire-Montjoly                               | Susceptible |
| Annual report, 'Institut Pasteur de la Guyane | <i>Ae. aegypti</i> | wild-caught larvae                    | 2000                          | dose unique     | Malathion          | 100                         | zéphir, Cayenne                               | Susceptible |
| Annual report, 'Institut Pasteur de la Guyane | <i>Ae. aegypti</i> | adults reared from wild caught larvae | 2000                          | diagnostic dose | Malathion          | 100                         | zéphir, Cayenne                               | Susceptible |
| Annual report, 'Institut Pasteur de la Guyane | <i>Ae. aegypti</i> | wild-caught larvae                    | 2000                          | diagnostic dose | Temephos           | 196                         | degrad des cannes, Cayenne                    | Resistant   |
| Annual report, 'Institut Pasteur de la Guyane | <i>Ae. aegypti</i> | wild-caught larvae                    | 2000                          | diagnostic dose | Temephos           | 92                          | degrad des cannes, Cayenne                    | Resistant   |
| Annual report, 'Institut Pasteur de la Guyane | <i>Ae. aegypti</i> | wild-caught larvae                    | 2000                          | dose-response   | Temephos           | NA                          | Lamirande, Matoury                            | Resistant   |
| Annual report, 'Institut Pasteur de la Guyane | <i>Ae. aegypti</i> | wild-caught larvae                    | 2000                          | dose-response   | Temephos           | NA                          | Rémire-Montjoly                               | Resistant   |
| Annual report, 'Institut Pasteur de la Guyane | <i>Ae. aegypti</i> | wild-caught larvae                    | 2000                          | dose-response   | Temephos           | NA                          | Saint Laurent du Maroni                       | Resistant   |
| Annual report, 'Institut Pasteur de la Guyane | <i>Ae. aegypti</i> | wild-caught larvae                    | 2000                          | dose-response   | Temephos           | NA                          | zéphir, Cayenne                               | Resistant   |
| Annual report, 'Institut Pasteur de la Guyane | <i>Ae. aegypti</i> | F1 larvae                             | 2001                          | dose-response   | Temephos           | 395                         | Lamirande, Matoury                            | Resistant   |
| Annual report, 'Institut Pasteur de la Guyane | <i>Ae. aegypti</i> | F1 larvae                             | 2001                          | dose-response   | Temephos           | NA                          | Rémire-Montjoly                               | Resistant   |

| Source of the data                            | Species            | Mosquitoes tested              | Collection date or date range | Protocol        | Insecticide tested | Number of mosquitoes tested | Collection site         | Status      |
|-----------------------------------------------|--------------------|--------------------------------|-------------------------------|-----------------|--------------------|-----------------------------|-------------------------|-------------|
| Annual report, 'Institut Pasteur de la Guyane | <i>Ae. aegypti</i> | wild-caught larvae             | 2001                          | dose-response   | Temephos           | NA                          | Saint Laurent du Maroni | Resistant   |
| Annual report, 'Institut Pasteur de la Guyane | <i>Ae. aegypti</i> | F2 larvae                      | 2001                          | dose-response   | Temephos           | NA                          | Zéphir, Cayenne         | Resistant   |
| Annual report, 'Institut Pasteur de la Guyane | <i>Ae. aegypti</i> | wild-caught larvae             | 2002                          | diagnostic dose | fenitrothion       | 54                          | Matoury                 | Susceptible |
| Annual report, 'Institut Pasteur de la Guyane | <i>Ae. aegypti</i> | wild-caught larvae             | 2002                          | diagnostic dose | fenitrothion       | 50                          | Rémire-Montjoly         | Susceptible |
| Annual report, 'Institut Pasteur de la Guyane | <i>Ae. aegypti</i> | wild-caught larvae             | 2002                          | diagnostic dose | fenitrothion       | 100                         | Rémire-Montjoly         | Susceptible |
| Annual report, 'Institut Pasteur de la Guyane | <i>Ae. aegypti</i> | wild-caught larvae             | 2002                          | diagnostic dose | fenitrothion       | 100                         | Macouria                | Susceptible |
| Annual report, 'Institut Pasteur de la Guyane | <i>Ae. aegypti</i> | Adults from wild caught larvae | 2002                          | diagnostic dose | deltamethrin       | 70                          | Macouria                | Resistant   |
| Annual report, 'Institut Pasteur de la Guyane | <i>Ae. aegypti</i> | F1 larvae                      | 2003                          | diagnostic dose | Temephos           | 194                         | Matoury                 | Resistant   |
| Annual report, 'Institut Pasteur de la Guyane | <i>Ae. aegypti</i> | F1 larvae                      | 2003                          | dose unique     | bti                | 100                         | Matoury                 | Susceptible |
| Annual report, 'Institut Pasteur de la Guyane | <i>Ae. aegypti</i> | F1 larvae                      | 2003                          | dose unique     | bti                | 100                         | Matoury                 | Susceptible |
| Annual report, 'Institut Pasteur de la Guyane | <i>Ae. aegypti</i> | Adults from wild caught larvae | 2003                          | diagnostic dose | malathion          | 100                         | Rémire-Montjoly         | Susceptible |
| Annual report, 'Institut Pasteur de la Guyane | <i>Ae. aegypti</i> | F1 Adults                      | 2004                          | diagnostic dose | deltamethrin       | 75                          | Matoury                 | Resistant   |
| Annual report, 'Institut Pasteur de la Guyane | <i>Ae. aegypti</i> | F1 Adults                      | 2004                          | diagnostic dose | deltamethrin       | 73                          | Rémire-Montjoly         | Resistant   |
| Annual report, 'Institut Pasteur de la Guyane | <i>Ae. aegypti</i> | F1 Adults                      | 2004                          | diagnostic dose | fenitrothion       | 100                         | Matoury                 | Susceptible |
| Annual report, 'Institut Pasteur de la Guyane | <i>Ae. aegypti</i> | F1 Adults                      | 2004                          | diagnostic dose | fenitrothion       | 80                          | Cayenne                 | Susceptible |
| Annual report, 'Institut Pasteur de la Guyane | <i>Ae. aegypti</i> | F1 Adults                      | 2004                          | diagnostic dose | fenitrothion       | 100                         | Kourou                  | Susceptible |
| Annual report, 'Institut Pasteur de la Guyane | <i>Ae. aegypti</i> | F1 Adults                      | 2004                          | diagnostic dose | fenitrothion       | 100                         | Cacao                   | Susceptible |
| Annual report, 'Institut Pasteur de la Guyane | <i>Ae. aegypti</i> | F1 Adults                      | 2004                          | diagnostic dose | malathion          | 100                         | Saint Jean du Maroni    | Susceptible |
| Annual report, 'Institut Pasteur de la Guyane | <i>Ae. aegypti</i> | F1 Adults                      | 2004                          | diagnostic dose | malathion          | 100                         | Régina                  | Susceptible |

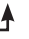

| Source of the data                            | Species            | Mosquitoes tested  | Collection date or date range | Protocol        | Insecticide tested | Number of mosquitoes tested | Collection site                    | Status      |
|-----------------------------------------------|--------------------|--------------------|-------------------------------|-----------------|--------------------|-----------------------------|------------------------------------|-------------|
| Annual report, 'Institut Pasteur de la Guyane | <i>Ae. aegypti</i> | F1 Adults          | 2004                          | diagnostic dose | deltamethrin       | 100                         | Saint Jean du Maroni               | Susceptible |
| Annual report, 'Institut Pasteur de la Guyane | <i>Ae. aegypti</i> | F1 larvae          | 2004                          | diagnostic dose | Temephos           | 200                         | Matoury                            | Resistant   |
| Annual report, 'Institut Pasteur de la Guyane | <i>Ae. aegypti</i> | F1 larvae          | 2004                          | diagnostic dose | Temephos           | 200                         | Rémire-Montjoly                    | Resistant   |
| Annual report, 'Institut Pasteur de la Guyane | <i>Ae. aegypti</i> | F1 larvae          | 2004                          | dose unique     | bti                | 100                         | Matoury                            | Susceptible |
| Annual report, 'Institut Pasteur de la Guyane | <i>Ae. aegypti</i> | F1 larvae          | 2004                          | dose unique     | bti                | 100                         | Rémire-Montjoly                    | Susceptible |
| Annual report, 'Institut Pasteur de la Guyane | <i>Ae. aegypti</i> | F1 larvae          | 2004                          | diagnostic dose | Temephos           | 100                         | Matoury                            | Resistant   |
| Annual report, 'Institut Pasteur de la Guyane | <i>Ae. aegypti</i> | F1 larvae          | 2004                          | diagnostic dose | Temephos           | 100                         | Rémire-Montjoly                    | Resistant   |
| Annual report, 'Institut Pasteur de la Guyane | <i>Ae. aegypti</i> | F1 larvae          | 2004                          | diagnostic dose | Temephos           | 100                         | Cayenne                            | Resistant   |
| Annual report, 'Institut Pasteur de la Guyane | <i>Ae. aegypti</i> | F1 larvae          | 2004                          | diagnostic dose | Temephos           | 100                         | Kourou                             | Resistant   |
| Annual report, 'Institut Pasteur de la Guyane | <i>Ae. aegypti</i> | F1 larvae          | 2004                          | diagnostic dose | Temephos           | 100                         | Cacao                              | Resistant   |
| Annual report, 'Institut Pasteur de la Guyane | <i>Ae. aegypti</i> | F1 larvae          | 2004                          | dose unique     | bti                | 100                         | Cacao                              | Susceptible |
| Annual report, 'Institut Pasteur de la Guyane | <i>Ae. aegypti</i> | F1 larvae          | 2004                          | diagnostic dose | Temephos           | 100                         | Régina                             | Resistant   |
| Annual report, 'Institut Pasteur de la Guyane | <i>Ae. aegypti</i> | F1 larvae          | 2004                          | diagnostic dose | Temephos           | 100                         | Saint Jean du Maroni               | Resistant   |
| Annual report, 'Institut Pasteur de la Guyane | <i>Ae. aegypti</i> | F1 larvae          | 2004                          | dose unique     | bti                | 100                         | Régina                             | Susceptible |
| Annual report, 'Institut Pasteur de la Guyane | <i>Ae. aegypti</i> | F1 larvae          | 2004                          | dose unique     | bti                | 100                         | Saint Jean du Maroni               | Susceptible |
| Annual report, 'Institut Pasteur de la Guyane | <i>Ae. aegypti</i> | wild-caught larvae | 2006                          | diagnostic dose | Temephos           | 100                         | degrad des cannes, Rémire-Montjoly | Resistant   |
| Annual report, 'Institut Pasteur de la Guyane | <i>Ae. aegypti</i> | wild-caught larvae | 2006                          | diagnostic dose | Temephos           | 100                         | Cabassou, Cayenne                  | Resistant   |
| Annual report, 'Institut Pasteur de la Guyane | <i>Ae. aegypti</i> | wild-caught larvae | 2006                          | diagnostic dose | Temephos           | 100                         | Tarzan, Cayenne                    | Resistant   |
| Annual report, 'Institut Pasteur de la Guyane | <i>Ae. aegypti</i> | wild-caught larvae | 2006                          | diagnostic dose | Temephos           | 100                         | Matoury                            | Resistant   |

| Source of the data                            | Species            | Mosquitoes tested              | Collection date or date range | Protocol        | Insecticide tested | Number of mosquitoes tested | Collection site                    | Status      |
|-----------------------------------------------|--------------------|--------------------------------|-------------------------------|-----------------|--------------------|-----------------------------|------------------------------------|-------------|
| Annual report, 'Institut Pasteur de la Guyane | <i>Ae. aegypti</i> | wild-caught larvae             | 2006                          | diagnostic dose | Temephos           | 100                         | Rémire-Montjoly                    | Resistant   |
| Annual report, 'Institut Pasteur de la Guyane | <i>Ae. aegypti</i> | Adults from wild-caught larvae | 2006                          | diagnostic dose | deltamethrin       | 97                          | Tarzan, Cayenne                    | Resistant   |
| Annual report, 'Institut Pasteur de la Guyane | <i>Ae. aegypti</i> | Adults from wild-caught larvae | 2006                          | diagnostic dose | deltamethrin       | 95                          | Rémire-Montjoly                    | Resistant   |
| Annual report, 'Institut Pasteur de la Guyane | <i>Ae. aegypti</i> | wild-caught larvae             | 2006                          | dose-response   | Temephos           | NA                          | degrad des cannes, Rémire-Montjoly | Resistant   |
| Annual report, 'Institut Pasteur de la Guyane | <i>Ae. aegypti</i> | wild-caught larvae             | 2006                          | dose-response   | Temephos           | NA                          | Cabassou, Cayenne                  | Resistant   |
| BASAG 2008 N°5, Girod et al. (2008)           | <i>Ae. aegypti</i> | wild-caught larvae             | 2006                          | diagnostic dose | Temephos           | 100                         | Saint Laurent du Maroni            | Resistant   |
| BASAG 2008 N°5, Girod et al. (2008)           | <i>Ae. aegypti</i> | wild-caught larvae             | 2006                          | diagnostic dose | Temephos           | 100                         | Régina                             | Resistant   |
| BASAG 2008 N°5, Girod et al. (2008)           | <i>Ae. aegypti</i> | wild-caught larvae             | 2006                          | diagnostic dose | Temephos           | 100                         | Mana                               | Resistant   |
| BASAG 2008 N°5, Girod et al. (2008)           | <i>Ae. aegypti</i> | wild-caught larvae             | 2006                          | diagnostic dose | Temephos           | 100                         | Iracoubo                           | Resistant   |
| BASAG 2008 N°5, Girod et al. (2008)           | <i>Ae. aegypti</i> | wild-caught larvae             | 2006                          | diagnostic dose | Temephos           | 83                          | Apatou                             | Resistant   |
| BASAG 2008 N°5, Girod et al. (2008)           | <i>Ae. aegypti</i> | Adults from wild-caught larvae | 2006                          | diagnostic dose | deltamethrin       | 98                          | Apatou                             | Resistant   |
| BASAG 2008 N°5, Girod et al. (2008)           | <i>Ae. aegypti</i> | Adults from wild-caught larvae | 2006                          | diagnostic dose | deltamethrin       | 100                         | Régina                             | Resistant   |
| BASAG 2008 N°5, Girod et al. (2008)           | <i>Ae. aegypti</i> | Adults from wild-caught larvae | 2006                          | diagnostic dose | deltamethrin       | 97                          | Iracoubo                           | Resistant   |
| BASAG 2008 N°5, Girod et al. (2008)           | <i>Ae. aegypti</i> | Adults from wild-caught larvae | 2006                          | diagnostic dose | deltamethrin       | 100                         | Saint Laurent du Maroni            | Resistant   |
| BASAG 2008 N°5, Girod et al. (2008)           | <i>Ae. aegypti</i> | Adults from wild-caught larvae | 2006                          | diagnostic dose | deltamethrin       | 100                         | Javouhey                           | Resistant   |
| BASAG 2008 N°5, Girod et al. (2008)           | <i>Ae. aegypti</i> | Adults from wild-caught larvae | 2006                          | diagnostic dose | fénitrothion       | 100                         | Apatou                             | Susceptible |
| BASAG 2008 N°5, Girod et al. (2008)           | <i>Ae. aegypti</i> | Adults from wild-caught larvae | 2006                          | diagnostic dose | fénitrothion       | 100                         | Régina                             | Susceptible |
| BASAG 2008 N°5, Girod et al. (2008)           | <i>Ae. aegypti</i> | Adults from wild-caught larvae | 2006                          | diagnostic dose | fénitrothion       | 100                         | Saint Laurent du Maroni            | Susceptible |
| BASAG 2008 N°5, Girod et al. (2008)           | <i>Ae. aegypti</i> | Adults from wild-caught larvae | 2006                          | diagnostic dose | fénitrothion       | 100                         | Mana                               | Susceptible |

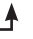

| Source of the data                  | Species            | Mosquitoes tested              | Collection date or date range | Protocol        | Insecticide tested | Number of mosquitoes tested | Collection site            | Status      |
|-------------------------------------|--------------------|--------------------------------|-------------------------------|-----------------|--------------------|-----------------------------|----------------------------|-------------|
| BASAG 2008 N°5, Girod et al. (2008) | <i>Ae. aegypti</i> | Adults from wild-caught larvae | 2006                          | diagnostic dose | fenitrothion       | 100                         | Iracoubo                   | Susceptible |
| BASAG 2008 N°5, Girod et al. (2008) | <i>Ae. aegypti</i> | wild-caught larvae             | 2007                          | diagnostic dose | Temephos           | 100                         | Saint Georges de l'Oyapock | Resistant   |
| BASAG 2008 N°5, Girod et al. (2008) | <i>Ae. aegypti</i> | Adults from wild-caught larvae | 2007                          | diagnostic dose | deltamethrin       | 80                          | Saint Georges de l'Oyapock | Resistant   |
| BASAG 2008 N°5, Girod et al. (2008) | <i>Ae. aegypti</i> | Adults from wild-caught larvae | 2007                          | diagnostic dose | fenitrothion       | 45                          | Saint Georges de l'Oyapock | Susceptible |
| Dusfour et al. (2011)               | <i>Ae. aegypti</i> | F1 adults                      | 2008                          | diagnostic dose | deltamethrin       | 302                         | Saint Georges de l'Oyapock | Resistant   |
| Dusfour et al. (2011)               | <i>Ae. aegypti</i> | F1 adults                      | 2009                          | diagnostic dose | deltamethrin       | 208                         | Cayenne                    | Resistant   |
| Dusfour et al. (2011)               | <i>Ae. aegypti</i> | F1 adults                      | 2009                          | diagnostic dose | deltamethrin       | 197                         | Kourou                     | Resistant   |
